# Supplementary material for: Investigation of an Allosteric Deoxyhypusine Synthase Inhibitor in P. falciparum
Source: MDPI journal article supplement (doi:10.3390/molecules27082463), 2022-04-11
Supplement: s1 [file s1]

Supplementary File:

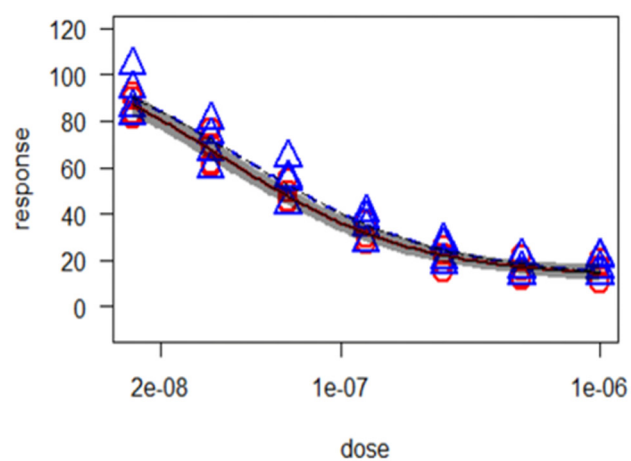

**Figure S1.** Control dose response growth inhibition curve with pyrimethamine against *PfDHS\_glmS* parasites with co-treatment of 2.5 mM GlcN (blue triangles) or without co-treatment (red circles). Each datapoint represents four independent experiments.
